# Supplementary material for: Downregulation of Glycine N-Acyltransferase in Kidney Renal Clear Cell Carcinoma: A Bioinformatic-Based Screening
Source: MDPI journal article supplement (doi:10.3390/diagnostics13233505), 2023-11-22
Supplement: s1 [file s1]

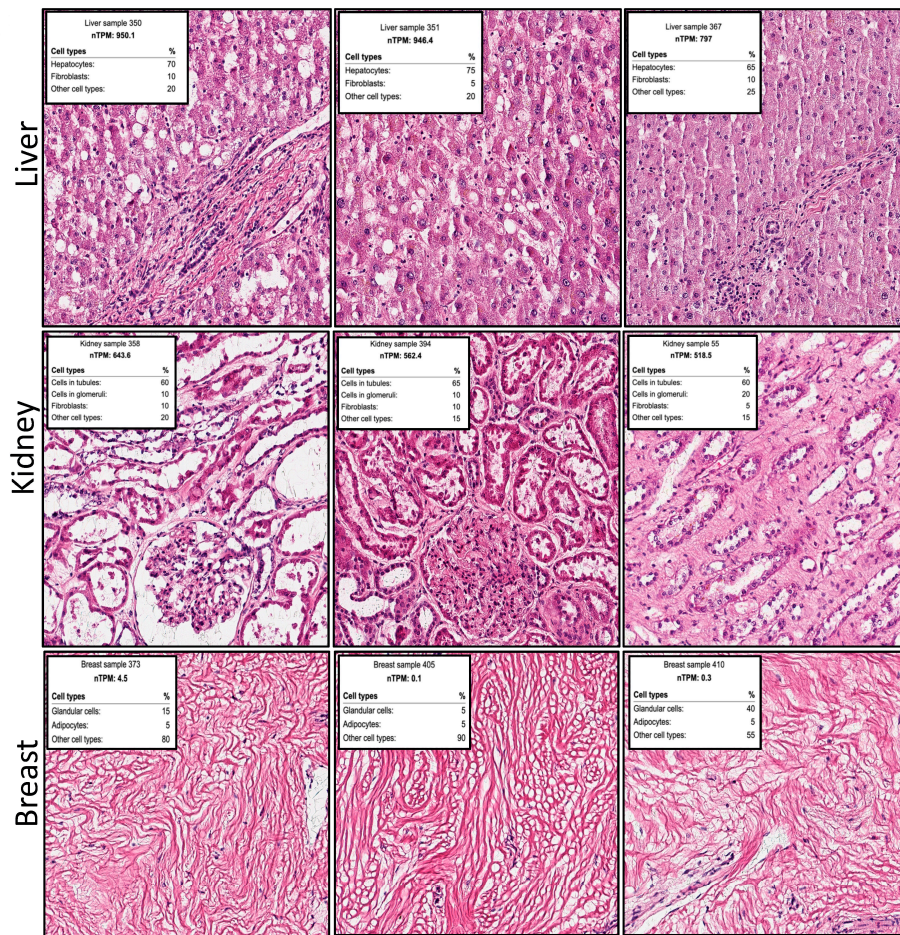

**Figure S1.** Hematoxylin and eosin staining of normal liver, kidney, and breast tissue used for transcriptomic profiling analysis. Images credit: HPA.

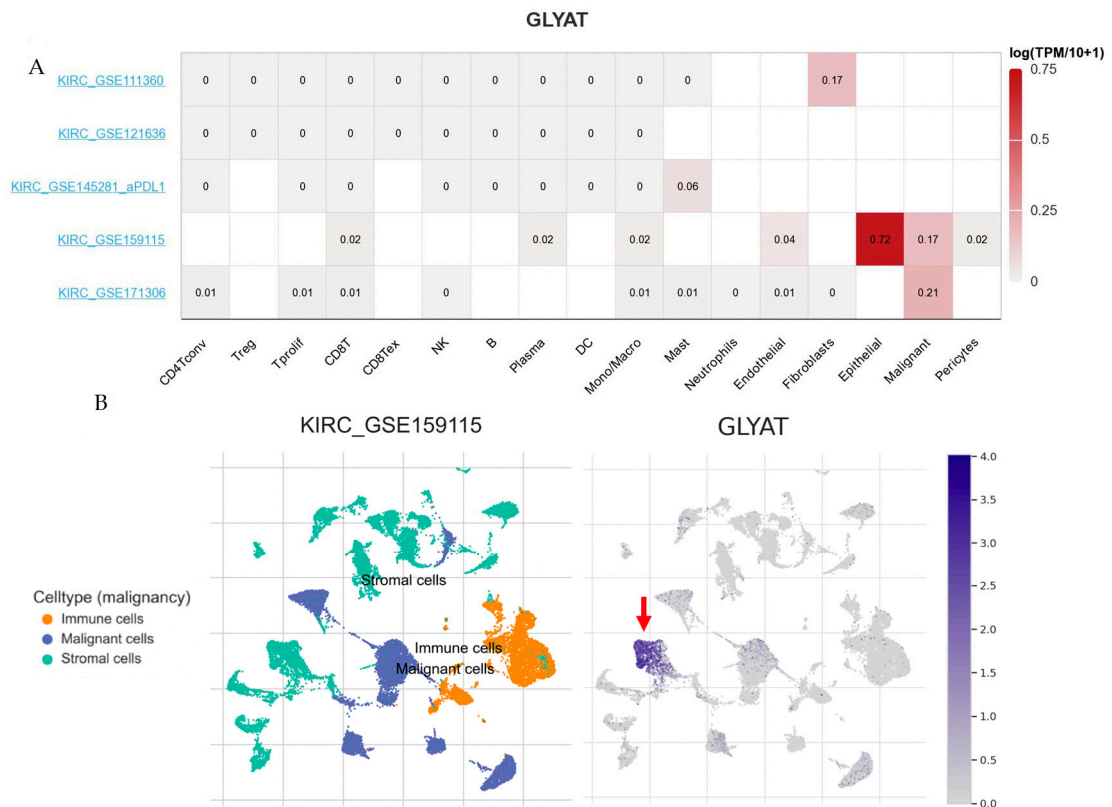

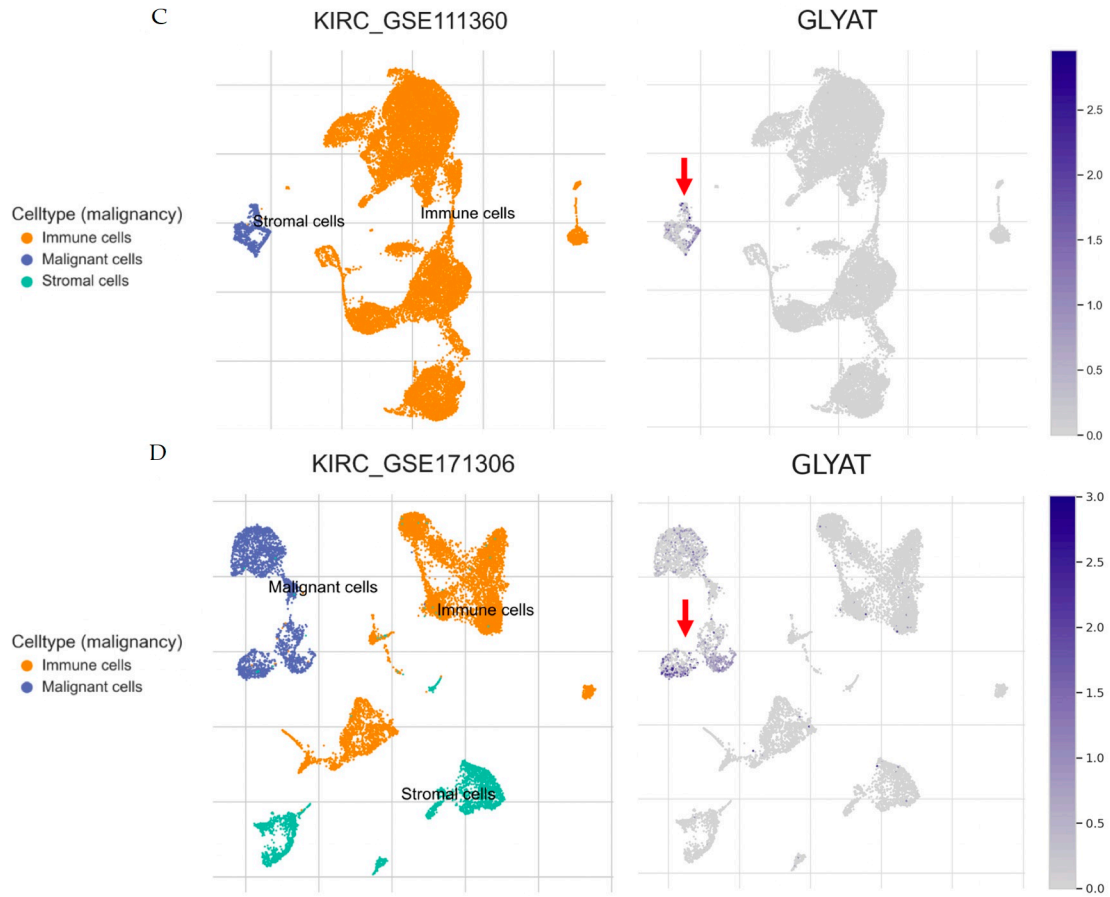

**Figure S2. (A)** Average gene expression of GLYAT on tumor microenvironment cells in KIRC. Plot represents scRNA-seq data obtained from the TISCH2 Web tool. Uniform Manifold Approximation and Projection (UMAP) showing GLYAT expression in GSE159115 (**B**), GSE111360 (**C**), and GSE171306 (**D**) datasets derived from primary tumors of KIRC. \*\*\*  $p < 0.001$ , and \*\*\*\*  $p < 0.0001$ .
