# Supplementary material for: Downregulation of Glycine N-Acyltransferase in Kidney Renal Clear Cell Carcinoma: A Bioinformatic-Based Screening
Source: Diagnostics (Basel). 2023 Nov 22;13(23):3505. doi: 10.3390/diagnostics13233505 (PMC10706668; doi:10.3390/diagnostics13233505)
Supplement: Supplementary file 1 [file diagnostics-13-03505-s001.zip › Table S1.xlsx]

## Sheet: Hoja1
Gene	Gene synonym	Ensembl	Gene description	Uniprot
ABCC6	ARA, EST349056, MLP1, MRP6, PXE, URG7	ENSG00000091262	ATP binding cassette subfamily C member 6	O95255
ACAA1	Lnc-Myd88	ENSG00000060971	Acetyl-CoA acyltransferase 1	P09110
ACAA2	DSAEC	ENSG00000167315	Acetyl-CoA acyltransferase 2	P42765
ACAD11	FLJ12592	ENSG00000240303	Acyl-CoA dehydrogenase family member 11	Q709F0
ACADSB	ACAD7, SBCAD	ENSG00000196177	Acyl-CoA dehydrogenase short/branched chain	P45954
ACAT1	ACAT, THIL	ENSG00000075239	Acetyl-CoA acetyltransferase 1	P24752
ACMSD		ENSG00000153086	Aminocarboxymuconate semialdehyde decarboxylase	Q8TDX5
ACO1	IREB1, IREBP, IRP1	ENSG00000122729	Aconitase 1	P21399
ACOT1	ACH2, CTE-1, LACH2	ENSG00000184227	Acyl-CoA thioesterase 1	Q86TX2
ACOT4	FLJ31235, PTE-Ib, PTE2B	ENSG00000177465	Acyl-CoA thioesterase 4	Q8N9L9
ACOX2	BRCACOX, BRCOX, THCCox	ENSG00000168306	Acyl-CoA oxidase 2	Q99424
ACSM2A	A-923A4.1, ACSM2, MGC150530	ENSG00000183747	Acyl-CoA synthetase medium chain family member 2A	Q08AH3
ACSM2B	ACSM2, HXMA, HYST1046	ENSG00000066813	Acyl-CoA synthetase medium chain family member 2B	Q68CK6
ACSM3	SA, SAH	ENSG00000005187	Acyl-CoA synthetase medium chain family member 3	Q53FZ2
ACSM5	FLJ20581	ENSG00000183549	Acyl-CoA synthetase medium chain family member 5	Q6NUN0
ACSS3	FLJ21963	ENSG00000111058	Acyl-CoA synthetase short chain family member 3	Q9H6R3
ADH5	ADH-3, ADHX, FDH, GSNOR	ENSG00000197894	Alcohol dehydrogenase 5 (class III), chi polypeptide	P11766
ADH6	ADH-5	ENSG00000172955	Alcohol dehydrogenase 6 (class V)	P28332
ADI1	APL1, ARD, FLJ10913, HMFT1638, MTCBP-1, mtnD, SIPL	ENSG00000182551	Acireductone dioxygenase 1	Q9BV57
ADK	AK	ENSG00000156110	Adenosine kinase	P55263
AFM	ALB2, ALBA	ENSG00000079557	Afamin	P43652
AGMAT	FLJ23384	ENSG00000116771	Agmatinase	Q9BSE5
AGXT2	AGT2	ENSG00000113492	Alanine--glyoxylate aminotransferase 2	Q9BYV1
AK4	AK3, AK3L1	ENSG00000162433	Adenylate kinase 4	P27144
ALDH1B1	ALDH5, ALDHX	ENSG00000137124	Aldehyde dehydrogenase 1 family member B1	P30837
ALDH4A1	ALDH4, P5CDh	ENSG00000159423	Aldehyde dehydrogenase 4 family member A1	P30038
ALDH6A1	MMSDH	ENSG00000119711	Aldehyde dehydrogenase 6 family member A1	Q02252
ALDH8A1	ALDH12	ENSG00000118514	Aldehyde dehydrogenase 8 family member A1	Q9H2A2
ALDH9A1	ALDH4, ALDH7, ALDH9, E3	ENSG00000143149	Aldehyde dehydrogenase 9 family member A1	P49189
ALG11	CDG1P, KIAA0266	ENSG00000253710	ALG11 alpha-1,2-mannosyltransferase	Q2TAA5
AMACR	P504S, RACE	ENSG00000242110	Alpha-methylacyl-CoA racemase	Q9UHK6
ANGPTL3	ANGPT5	ENSG00000132855	Angiopoietin like 3	Q9Y5C1
APOM	Apo-M, G3a, NG20	ENSG00000204444	Apolipoprotein M	O95445
AR	AIS, DHTR, HUMARA, NR3C4, SBMA, SMAX1	ENSG00000169083	Androgen receptor	P10275
ARHGEF12	KIAA0382, LARG	ENSG00000196914	Rho guanine nucleotide exchange factor 12	Q9NZN5
ARMT1	C6orf211, FLJ12910	ENSG00000146476	Acidic residue methyltransferase 1	Q9H993
ASL	ASAL	ENSG00000126522	Argininosuccinate lyase	P04424
ASS1	ASS, CTLN1	ENSG00000130707	Argininosuccinate synthase 1	P00966
ATG5	APG5, APG5L, ASP, hAPG5	ENSG00000057663	Autophagy related 5	Q9H1Y0
ATP11C	ATPIG, ATPIQ	ENSG00000101974	ATPase phospholipid transporting 11C	Q8NB49
ATP13A3	AFURS1	ENSG00000133657	ATPase 13A3	Q9H7F0
AVPR1A	AVPR1	ENSG00000166148	Arginine vasopressin receptor 1A	P37288
BCKDHB		ENSG00000083123	Branched chain keto acid dehydrogenase E1 subunit beta	P21953
BHMT	BHMT1	ENSG00000145692	Betaine--homocysteine S-methyltransferase	Q93088
BHMT2		ENSG00000132840	Betaine--homocysteine S-methyltransferase 2	Q9H2M3
BPHL	Bph-rp, MCNAA, VACVase	ENSG00000137274	Biphenyl hydrolase like	Q86WA6
BPNT2	FLJ20421, gPAPP, IMPA3, IMPAD1	ENSG00000104331	3'(2'), 5'-bisphosphate nucleotidase 2	Q9NX62
C5orf15	HTGN29, KCT2	ENSG00000113583	Chromosome 5 open reading frame 15	Q8NC54
C5orf24	FLJ37562	ENSG00000181904	Chromosome 5 open reading frame 24	Q7Z6I8
CAT		ENSG00000121691	Catalase	P04040
CBR4	FLJ14431, SDR45C1	ENSG00000145439	Carbonyl reductase 4	Q8N4T8
CERS2	FLJ10243, LASS2, SP260	ENSG00000143418	Ceramide synthase 2	Q96G23
CFI	C3b-INA, FI, IF, KAF	ENSG00000205403	Complement factor I	P05156
CISH	CIS, CIS-1, G18, SOCS	ENSG00000114737	Cytokine inducible SH2 containing protein	Q9NSE2
CLDN14	DFNB29	ENSG00000159261	Claudin 14	O95500
CNIH1	CNIH, CNIL, TGAM77	ENSG00000100528	Cornichon family AMPA receptor auxiliary protein 1	O95406
COBLL1	KIAA0977	ENSG00000082438	Cordon-bleu WH2 repeat protein like 1	Q53SF7
CRYBB3	CRYB3	ENSG00000100053	Crystallin beta B3	P26998
CRYZ		ENSG00000116791	Crystallin zeta	Q08257
CYB5A	CYB5	ENSG00000166347	Cytochrome b5 type A	P00167
CYP3A7-CYP3A51P		ENSG00000282301	CYP3A7-CYP3A51P readthrough
CYP4A11	CYP4A2, CYP4AII	ENSG00000187048	Cytochrome P450 family 4 subfamily A member 11	Q02928
CYP4A22		ENSG00000162365	Cytochrome P450 family 4 subfamily A member 22	Q5TCH4
CYP4V2	CYP4AH1	ENSG00000145476	Cytochrome P450 family 4 subfamily V member 2	Q6ZWL3
CYP7B1	SPG5A	ENSG00000172817	Cytochrome P450 family 7 subfamily B member 1	O75881
DAO	DAAO, DAMOX	ENSG00000110887	D-amino acid oxidase	P14920
DBT	BCKAD-E2, BCKDH-E2, BCOADC-E2	ENSG00000137992	Dihydrolipoamide branched chain transacylase E2	P11182
DHTKD1	CMT2Q, DKFZP762M115, KIAA1630, MGC3090	ENSG00000181192	Dehydrogenase E1 and transketolase domain containing 1	Q96HY7
DIO1	TXDI1	ENSG00000211452	Iodothyronine deiodinase 1	P49895
DMGDH	ME2GLYDH	ENSG00000132837	Dimethylglycine dehydrogenase	Q9UI17
DMRTA1		ENSG00000176399	DMRT like family A1	Q5VZB9
DNAJC16	KIAA0962	ENSG00000116138	DnaJ heat shock protein family (Hsp40) member C16	Q9Y2G8
DNMT3L	MGC1090	ENSG00000142182	DNA methyltransferase 3 like	Q9UJW3
DPYS	DHPase	ENSG00000147647	Dihydropyrimidinase	Q14117
EBAG9	EB9, RCAS1	ENSG00000147654	Estrogen receptor binding site associated antigen 9	O00559
ECHDC1	dJ351K20.2	ENSG00000093144	Ethylmalonyl-CoA decarboxylase 1	Q9NTX5
ECHDC2	FLJ10948	ENSG00000121310	Enoyl-CoA hydratase domain containing 2	Q86YB7
ECHS1	SCEH	ENSG00000127884	Enoyl-CoA hydratase, short chain 1	P30084
EHHADH	ECHD	ENSG00000113790	Enoyl-CoA hydratase and 3-hydroxyacyl CoA dehydrogenase	Q08426
ENSG00000273047		ENSG00000273047	Novel transcript, LIME1-SLC2A4RG readthrough
EPB41L5	BE37, FLJ12957, KIAA1548, LULU, LULU1, YMO1, YRT	ENSG00000115109	Erythrocyte membrane protein band 4.1 like 5	Q9HCM4
ERLIN2	C8orf2, Erlin-2, NET32, SPFH2, SPG18	ENSG00000147475	ER lipid raft associated 2	O94905
ESD		ENSG00000139684	Esterase D	P10768
ETFBKMT	C12orf72, DKFZp451L235, METTL20, MGC50559	ENSG00000139160	Electron transfer flavoprotein subunit beta lysine methyltransferase	Q8IXQ9
ETNK2	EKI2, FLJ10761	ENSG00000143845	Ethanolamine kinase 2	Q9NVF9
FAH		ENSG00000103876	Fumarylacetoacetate hydrolase	P16930
FAM20A	DKFZp434F2322	ENSG00000108950	FAM20A golgi associated secretory pathway pseudokinase	Q96MK3
FAM8A1	AHCP	ENSG00000137414	Family with sequence similarity 8 member A1	Q9UBU6
FARP1	CDEP, GLCC1, MGC87400, PLEKHC2, PPP1R75	ENSG00000152767	FERM, ARH/RhoGEF and pleckstrin domain protein 1	Q9Y4F1
FAXDC2	C5orf4, FLJ13758	ENSG00000170271	Fatty acid hydroxylase domain containing 2	Q96IV6
FBXL4	FBL4, FBL5	ENSG00000112234	F-box and leucine rich repeat protein 4	Q9UKA2
FBXO17	FBG4, Fbx17, FBXO26, FLJ11798, FLJ25205, MGC9379	ENSG00000269190	F-box protein 17	Q96EF6
FMO4	FMO2	ENSG00000076258	Flavin containing dimethylaniline monoxygenase 4	P31512
FREM2	DKFZp686J0811	ENSG00000150893	FRAS1 related extracellular matrix 2	Q5SZK8
FTCD		ENSG00000160282	Formimidoyltransferase cyclodeaminase	O95954
G6PC1	G6PC, G6PT, GSD1a	ENSG00000131482	Glucose-6-phosphatase catalytic subunit 1	P35575
GCGR	GGR	ENSG00000215644	Glucagon receptor	P47871
GCHFR	GFRP, HsT16933	ENSG00000137880	GTP cyclohydrolase I feedback regulator	P30047
GCLM	GLCLR	ENSG00000023909	Glutamate-cysteine ligase modifier subunit	P48507
GGH	GATD10	ENSG00000137563	Gamma-glutamyl hydrolase	Q92820
GLDC	GCSP, NKH	ENSG00000178445	Glycine decarboxylase	P23378
GLTPD2		ENSG00000182327	Glycolipid transfer protein domain containing 2	A6NH11
GLYAT	ACGNAT, GAT	ENSG00000149124	Glycine-N-acyltransferase	Q6IB77
GLYATL1	FLJ34646, MGC15397	ENSG00000166840	Glycine-N-acyltransferase like 1	Q969I3
GPR89A	UNQ192	ENSG00000117262	G protein-coupled receptor 89A	B7ZAQ6
GRHPR	GLXR, PH2	ENSG00000137106	Glyoxylate and hydroxypyruvate reductase	Q9UBQ7
GSTA1		ENSG00000243955	Glutathione S-transferase alpha 1	P08263
GSTA2	GST2	ENSG00000244067	Glutathione S-transferase alpha 2	P09210
GTPBP10	DKFZP686A10121, FLJ38242, OBGH2	ENSG00000105793	GTP binding protein 10	A4D1E9
HAAO		ENSG00000162882	3-hydroxyanthranilate 3,4-dioxygenase	P46952
HAO2	GIG16, HAOX2	ENSG00000116882	Hydroxyacid oxidase 2	Q9NYQ3
HGD	AKU, HGO	ENSG00000113924	Homogentisate 1,2-dioxygenase	Q93099
HIBADH	NS5ATP1	ENSG00000106049	3-hydroxyisobutyrate dehydrogenase	P31937
HIBCH		ENSG00000198130	3-hydroxyisobutyryl-CoA hydrolase	Q6NVY1
HLCS	HCS	ENSG00000159267	Holocarboxylase synthetase	P50747
HMGCL	HL	ENSG00000117305	3-hydroxy-3-methylglutaryl-CoA lyase	P35914
HNMT		ENSG00000150540	Histamine N-methyltransferase	P50135
HOGA1	C10orf65, DHDPS2, DHDPSL, FLJ37472, NPL2	ENSG00000241935	4-hydroxy-2-oxoglutarate aldolase 1	Q86XE5
HPD	4-HPPD, 4HPPD, GLOD3, PPD	ENSG00000158104	4-hydroxyphenylpyruvate dioxygenase	P32754
HSD17B4	DBP, MFE-2, SDR8C1	ENSG00000133835	Hydroxysteroid 17-beta dehydrogenase 4	P51659
IBTK	BTBD26, BTKI, DKFZP564B116	ENSG00000005700	Inhibitor of Bruton tyrosine kinase	Q9P2D0
IL13RA1	CD213a1, IL-13Ra, NR4	ENSG00000131724	Interleukin 13 receptor subunit alpha 1	P78552
IMMP2L	IMMP2L-IT1, IMP2	ENSG00000184903	Inner mitochondrial membrane peptidase subunit 2	Q96T52
KICS2	C12orf66, FLJ32549	ENSG00000174206	KICSTOR subunit 2	Q96MD2
KMO		ENSG00000117009	Kynurenine 3-monooxygenase	O15229
KNG1	BDK, BK, HK, HMWK, KNG	ENSG00000113889	Kininogen 1	P01042
LACTB2	CGI-83	ENSG00000147592	Lactamase beta 2	Q53H82
LARP4	PP13296	ENSG00000161813	La ribonucleoprotein 4	Q71RC2
LGSN	GLULD1, LGS	ENSG00000146166	Lengsin, lens protein with glutamine synthetase domain	Q5TDP6
LMAN1	ERGIC-53, ERGIC53, F5F8D, FMFD1, gp58, MCFD1, MR60	ENSG00000074695	Lectin, mannose binding 1	P49257
LYSMD3	FLJ13542	ENSG00000176018	LysM domain containing 3	Q7Z3D4
MBTPS2	KFSD, S2P	ENSG00000012174	Membrane bound transcription factor peptidase, site 2	O43462
MCCC1	MCCA, MCCCalpha	ENSG00000078070	Methylcrotonyl-CoA carboxylase subunit 1	Q96RQ3
MCCC2	MCCB, MCCCbeta	ENSG00000131844	Methylcrotonyl-CoA carboxylase subunit 2	Q9HCC0
METTL7A	DKFZP586A0522	ENSG00000185432	Methyltransferase like 7A	Q9H8H3
MMAA	cblA	ENSG00000151611	Metabolism of cobalamin associated A	Q8IVH4
MMUT	MCM, MUT	ENSG00000146085	Methylmalonyl-CoA mutase	P22033
MRPL19	KIAA0104, MRP-L15, RLX1, RPML15	ENSG00000115364	Mitochondrial ribosomal protein L19	P49406
MRPL42	HSPC204, MRP-L31, MRPL31, MRPS32, PTD007, RPML31	ENSG00000198015	Mitochondrial ribosomal protein L42	Q9Y6G3
MSH3	DUP, MRP1	ENSG00000113318	MutS homolog 3	P20585
MST1	D3F15S2, DNF15S2, HGFL, MSP, NF15S2	ENSG00000173531	Macrophage stimulating 1
MT1F	MT1	ENSG00000198417	Metallothionein 1F	P04733
MT1G	MT1, MT1K	ENSG00000125144	Metallothionein 1G	P13640
MT1H	MT1	ENSG00000205358	Metallothionein 1H	P80294
MTARC2	FLJ20605, MARC2, MOSC2	ENSG00000117791	Mitochondrial amidoxime reducing component 2	Q969Z3
MTFR1	CHPPR, FAM54A2, KIAA0009	ENSG00000066855	Mitochondrial fission regulator 1	Q15390
MTHFD1	MTHFC, MTHFD	ENSG00000100714	Methylenetetrahydrofolate dehydrogenase, cyclohydrolase and formyltetrahydrofolate synthetase 1	P11586
MTO1		ENSG00000135297	Mitochondrial tRNA translation optimization 1	Q9Y2Z2
NANP	C20orf147, dJ694B14.3, HDHD4, MGC26833	ENSG00000170191	N-acetylneuraminic acid phosphatase	Q8TBE9
NIPSNAP1		ENSG00000184117	Nipsnap homolog 1	Q9BPW8
NIT2		ENSG00000114021	Nitrilase family member 2	Q9NQR4
NUCB1	Calnuc, NUC	ENSG00000104805	Nucleobindin 1	Q02818
NUDT6	FGF-AS, FGF2AS, gfg, gfg-1	ENSG00000170917	Nudix hydrolase 6	P53370
OCEL1	FLJ22709	ENSG00000099330	Occludin/ELL domain containing 1	Q9H607
OSBP	OSBP1	ENSG00000110048	Oxysterol binding protein	P22059
PAH	PH	ENSG00000171759	Phenylalanine hydroxylase	P00439
PALM3		ENSG00000187867	Paralemmin 3	A6NDB9
PANK1	MGC24596, PANK, PANK1a, PANK1b	ENSG00000152782	Pantothenate kinase 1	Q8TE04
PCK1	PEPCK-C	ENSG00000124253	Phosphoenolpyruvate carboxykinase 1	P35558
PCTP	STARD2	ENSG00000141179	Phosphatidylcholine transfer protein	Q9UKL6
PCYOX1	KIAA0908, PCL1	ENSG00000116005	Prenylcysteine oxidase 1	Q9UHG3
PDE11A		ENSG00000128655	Phosphodiesterase 11A	Q9HCR9
PDP2	KIAA1348, PPM2B, PPM2C2	ENSG00000172840	Pyruvate dehydrogenase phosphatase catalytic subunit 2	Q9P2J9
PDSS2	bA59I9.3, C6orf210, COQ1B	ENSG00000164494	Decaprenyl diphosphate synthase subunit 2	Q86YH6
PECR	HSA250303, SDR29C1, TERP	ENSG00000115425	Peroxisomal trans-2-enoyl-CoA reductase	Q9BY49
PEX13		ENSG00000162928	Peroxisomal biogenesis factor 13	Q92968
PEX3		ENSG00000034693	Peroxisomal biogenesis factor 3	P56589
PIK3R4	p150, VPS15	ENSG00000196455	Phosphoinositide-3-kinase regulatory subunit 4	Q99570
PIPOX	LPIPOX	ENSG00000179761	Pipecolic acid and sarcosine oxidase	Q9P0Z9
PKLR		ENSG00000143627	Pyruvate kinase L/R	P30613
PLG		ENSG00000122194	Plasminogen	P00747
PNPO	PDXPO	ENSG00000108439	Pyridoxamine 5'-phosphate oxidase	Q9NVS9
POFUT1	FUT12, KIAA0180, O-Fuc-T, O-FUT	ENSG00000101346	Protein O-fucosyltransferase 1	Q9H488
PRDX3	AOP-1, AOP1, MER5, SP-22	ENSG00000165672	Peroxiredoxin 3	P30048
PRODH2	HSPOX1	ENSG00000250799	Proline dehydrogenase 2	Q9UF12
PROZ	PZ	ENSG00000126231	Protein Z, vitamin K dependent plasma glycoprotein	P22891
PTS	PTPS	ENSG00000150787	6-pyruvoyltetrahydropterin synthase	Q03393
RAB14	FBP, RAB-14	ENSG00000119396	RAB14, member RAS oncogene family	P61106
RBBP9	Bog	ENSG00000089050	RB binding protein 9, serine hydrolase	O75884
RBP5	CRBPIII	ENSG00000139194	Retinol binding protein 5	P82980
RCAN1	DSCR1	ENSG00000159200	Regulator of calcineurin 1	P53805
RIDA	HRSP12, P14.5, PSP, UK114	ENSG00000132541	Reactive intermediate imine deaminase A homolog	P52758
RIPPLY1		ENSG00000147223	Ripply transcriptional repressor 1	Q0D2K3
RMND1	bA351K16.3, C6orf96, FLJ20627, RMD1	ENSG00000155906	Required for meiotic nuclear division 1 homolog	Q9NWS8
RNF185	FLJ38628	ENSG00000138942	Ring finger protein 185	Q96GF1
RSC1A1	RS1	ENSG00000215695	Regulator of solute carriers 1	Q92681
SCYL3	PACE-1, PACE1	ENSG00000000457	SCY1 like pseudokinase 3	Q8IZE3
SDC2	CD362, fibroglycan, HSPG, HSPG1, SYND2	ENSG00000169439	Syndecan 2	P34741
SDSL	cSDH, SDS-RS1	ENSG00000139410	Serine dehydratase like	Q96GA7
SEPHS1	SPS, SPS1	ENSG00000086475	Selenophosphate synthetase 1	P49903
SHMT1	cSHMT, MGC15229, MGC24556, SHMT	ENSG00000176974	Serine hydroxymethyltransferase 1	P34896
SLC16A2	AHDS, DXS128, DXS128E, MCT7, MCT8, MRX22, XPCT	ENSG00000147100	Solute carrier family 16 member 2	P36021
SLC22A7	NLT, OAT2	ENSG00000137204	Solute carrier family 22 member 7	Q9Y694
SLC25A10	DIC	ENSG00000183048	Solute carrier family 25 member 10	Q9UBX3
SLC25A13	ARALAR2, CITRIN, CTLN2	ENSG00000004864	Solute carrier family 25 member 13	Q9UJS0
SLC27A2	ACSVL1, FACVL1, FATP2, hFACVL1, HsT17226, VLACS, VLCS	ENSG00000140284	Solute carrier family 27 member 2	O14975
SLC2A9	Glut9, GLUTX, URATv1	ENSG00000109667	Solute carrier family 2 member 9	Q9NRM0
SLC37A4	G6PT, G6PT1, G6PT2, G6PT3, GSD1b, GSD1c, GSD1d, SPX4	ENSG00000137700	Solute carrier family 37 member 4
SLC47A1	FLJ10847, MATE1	ENSG00000142494	Solute carrier family 47 member 1	Q96FL8
SMPD1	ASM	ENSG00000166311	Sphingomyelin phosphodiesterase 1	P17405
SNX4	ATG24B	ENSG00000114520	Sorting nexin 4	O95219
SORD		ENSG00000140263	Sorbitol dehydrogenase	Q00796
ST20-MTHFS		ENSG00000259332	ST20-MTHFS readthrough
STAU1	PPP1R150, STAU	ENSG00000124214	Staufen double-stranded RNA binding protein 1	O95793
SUGCT	C7orf10, DERP13, FLJ11808, ORF19	ENSG00000175600	Succinyl-CoA:glutarate-CoA transferase	Q9HAC7
SUOX		ENSG00000139531	Sulfite oxidase	P51687
TBC1D23	FLJ11046	ENSG00000036054	TBC1 domain family member 23	Q9NUY8
TCAIM	C3orf23, DKFZp313N0621, TOAG-1	ENSG00000179152	T cell activation inhibitor, mitochondrial	Q8N3R3
THNSL1	FLJ22002, TSH1	ENSG00000185875	Threonine synthase like 1	Q8IYQ7
TMBIM6	BAXI1, BI-1, TEGT	ENSG00000139644	Transmembrane BAX inhibitor motif containing 6	P55061
TMEM106B	FLJ11273, MGC33727	ENSG00000106460	Transmembrane protein 106B	Q9NUM4
TMEM135	FLJ22104	ENSG00000166575	Transmembrane protein 135	Q86UB9
TMEM176A	HCA112, MS4B1	ENSG00000002933	Transmembrane protein 176A	Q96HP8
TMEM176B	LR8, MS4B2	ENSG00000106565	Transmembrane protein 176B	Q3YBM2
TMEM192	FLJ38482	ENSG00000170088	Transmembrane protein 192	Q8IY95
TMEM33	FLJ10525, Pom33	ENSG00000109133	Transmembrane protein 33	P57088
TMEM60	C7orf35, DC32	ENSG00000135211	Transmembrane protein 60	Q9H2L4
TRIM49D1	TRIM49D, TRIM49D1P, TRIM49DP	ENSG00000223417	Tripartite motif containing 49D1	C9J1S8
TRIQK	C8orf83, DKFZp779L1068, LOC286144, PRO0845	ENSG00000205133	Triple QxxK/R motif containing	Q629K1
TRMT11	C6orf75, dJ187J11.2, MDS024, TRM11, TRMT11-1	ENSG00000066651	TRNA methyltransferase 11 homolog	Q7Z4G4
TRPM8		ENSG00000144481	Transient receptor potential cation channel subfamily M member 8	Q7Z2W7
UGT1A6	GNT1, HLUGP, UGT1F	ENSG00000167165	UDP glucuronosyltransferase family 1 member A6	P19224
UGT2A2		ENSG00000271271	UDP glucuronosyltransferase family 2 member A2	P0DTE5
UGT2B7	UGT2B9	ENSG00000171234	UDP glucuronosyltransferase family 2 member B7	P16662
UGT3A1	FLJ34658	ENSG00000145626	UDP glycosyltransferase family 3 member A1	Q6NUS8
UPB1	BUP1	ENSG00000100024	Beta-ureidopropionase 1	Q9UBR1
UPP2	UDRPASE2, UP2, UPASE2	ENSG00000007001	Uridine phosphorylase 2	O95045
WDR36	GLC1G, TA-WDRP, UTP21	ENSG00000134987	WD repeat domain 36
XYLB	FLJ10343, FLJ12539	ENSG00000093217	Xylulokinase	O75191
YIPF6	FinGER6, MGC21416	ENSG00000181704	Yip1 domain family member 6	Q96EC8
ZCCHC9	DKFZp761J139, PPP1R41	ENSG00000131732	Zinc finger CCHC-type containing 9	Q8N567
ZDHHC16	APH2	ENSG00000171307	Zinc finger DHHC-type palmitoyltransferase 16	Q969W1
ZMPSTE24	FACE-1, HGPS, PRO1, STE24, Ste24p	ENSG00000084073	Zinc metallopeptidase STE24	O75844
ZNF511-PRAP1		ENSG00000283496	ZNF511-PRAP1 readthrough
