# Supplementary material for: Downregulation of Glycine N-Acyltransferase in Kidney Renal Clear Cell Carcinoma: A Bioinformatic-Based Screening
Source: Diagnostics (Basel). 2023 Nov 22;13(23):3505. doi: 10.3390/diagnostics13233505 (PMC10706668; doi:10.3390/diagnostics13233505)
Supplement: Supplementary file 1 [file diagnostics-13-03505-s001.zip › Table S2.xlsx]

## Sheet: Sheet1
miRTargetLink 2.0
miRNA	Target / Target pathway	Support	Source	Experiment(s)	Reference - PMID
hsa-miR-1281	GLYAT	Functional MTI (Weak)	MIRT678460	HITS-CLIP	23824327
hsa-miR-1304-3p	GLYAT	Functional MTI (Weak)	MIRT678458	HITS-CLIP	23824327
hsa-miR-1307-3p	GLYAT	Functional MTI (Weak)	MIRT678456	HITS-CLIP	23824327
hsa-miR-1539	GLYAT	Functional MTI (Weak)	MIRT678462	HITS-CLIP	23824327
hsa-miR-1976	GLYAT	Functional MTI (Weak)	MIRT678457	HITS-CLIP	23824327
hsa-miR-3193	GLYAT	Functional MTI (Weak)	MIRT678461	HITS-CLIP	23824327
hsa-miR-4284	GLYAT	Functional MTI (Weak)	MIRT678451	HITS-CLIP	23824327
hsa-miR-4485-5p	GLYAT	Functional MTI (Weak)	MIRT678464	HITS-CLIP	23824327
hsa-miR-4638-5p	GLYAT	Functional MTI (Weak)	MIRT678455	HITS-CLIP	23824327
hsa-miR-4772-3p	GLYAT	Functional MTI (Weak)	MIRT678454	HITS-CLIP	23824327
hsa-miR-498	GLYAT	Functional MTI (Weak)	MIRT678450	HITS-CLIP	23824327
hsa-miR-5693	GLYAT	Functional MTI (Weak)	MIRT679250	HITS-CLIP	23824327
hsa-miR-660-3p	GLYAT	Functional MTI (Weak)	MIRT678463	HITS-CLIP	23824327
hsa-miR-6741-3p	GLYAT	Functional MTI (Weak)	MIRT678459	HITS-CLIP	23824327
hsa-miR-6791-3p	GLYAT	Functional MTI (Weak)	MIRT678453	HITS-CLIP	23824327
hsa-miR-6829-3p	GLYAT	Functional MTI (Weak)	MIRT678452	HITS-CLIP	23824327
hsa-miR-6890-3p	GLYAT	Functional MTI (Weak)	MIRT678465	HITS-CLIP	23824327
hsa-miR-891a-3p	GLYAT	Functional MTI (Weak)	MIRT679249	HITS-CLIP	23824327
